# Supplementary material
Source: publisher figshare collection journal article supplement (https://gsajournals.figshare.com/articles/dataset/_/13517432)
Supplement: Supplementary file 1 [file 1]

Figure S2

a

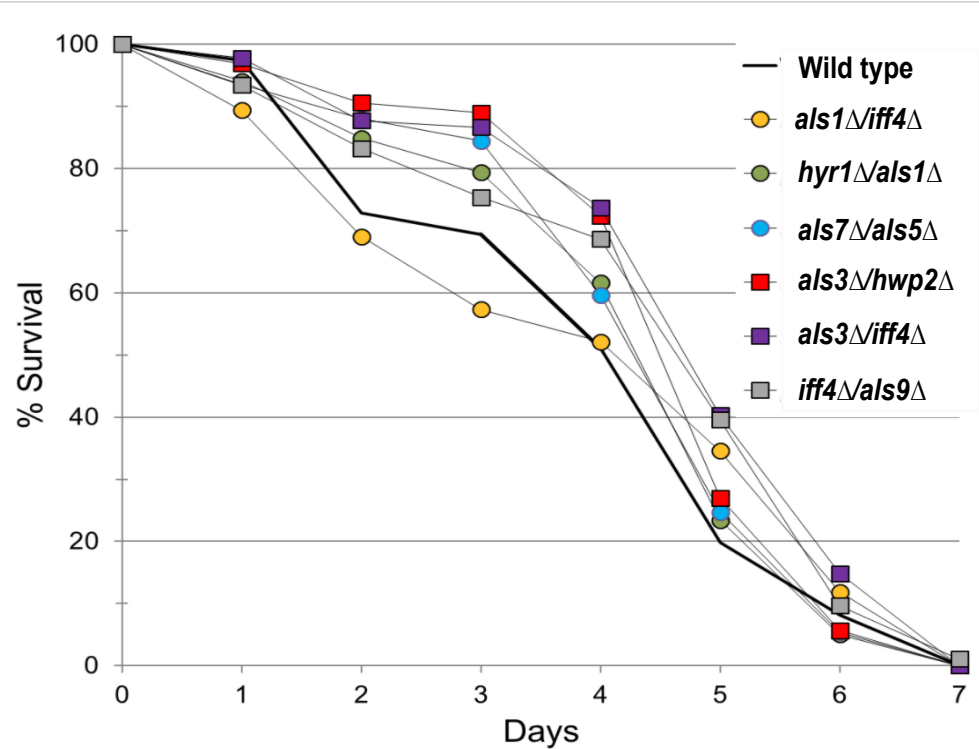

**Figure S2. Survival analysis of *C. albicans*-*C. elegans* killing in agar-based assay.** In an agar-based assay, *C. elegans* survival was monitored and scored daily after infection with *C. albicans* wild-type and mutant strains. Survival was plotted with Kaplan-Mayer curves, which demonstrates longitudinal survival of *C. elegans* over seven days.
