# Supplementary material
Source: publisher figshare collection journal article supplement (https://gsajournals.figshare.com/articles/dataset/_/13517432)
Supplement: Supplementary file 2 [file 1]

Figure S3

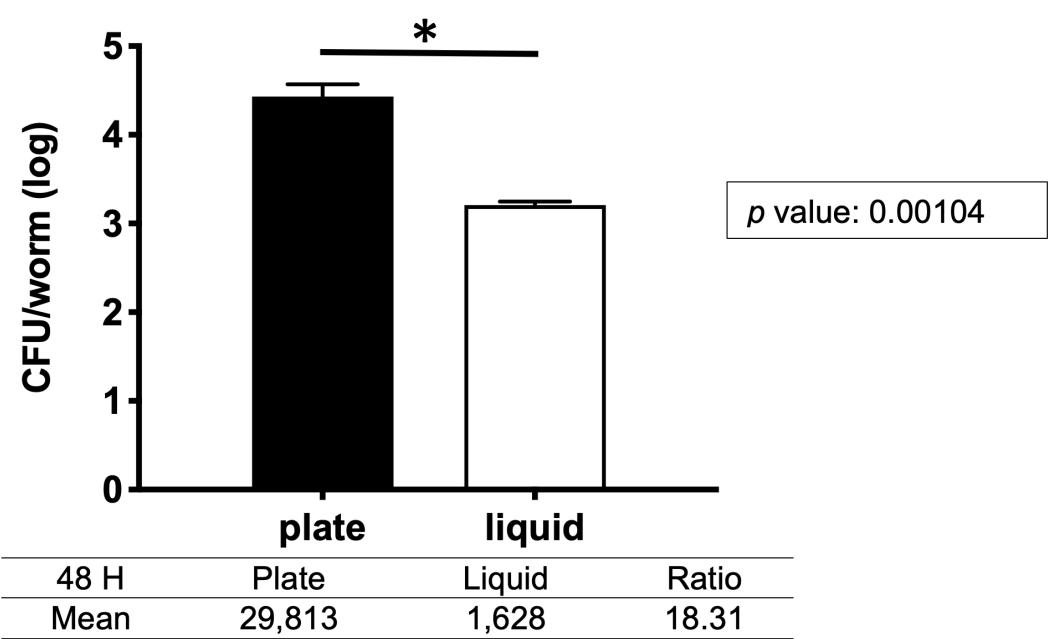

**Figure S3. Fungal colonization on agar is higher than in liquid pathogenesis conditions.** *C. albicans* colonization of *C. elegans* was measured for agar (plate) vs. liquid pathogenesis conditions, and quantified as CFU/worm.
