# Supplementary material
Source: publisher figshare collection journal article supplement (https://gsajournals.figshare.com/articles/dataset/_/13517432)
Supplement: Supplementary file 3 [file 1]

Figure S1

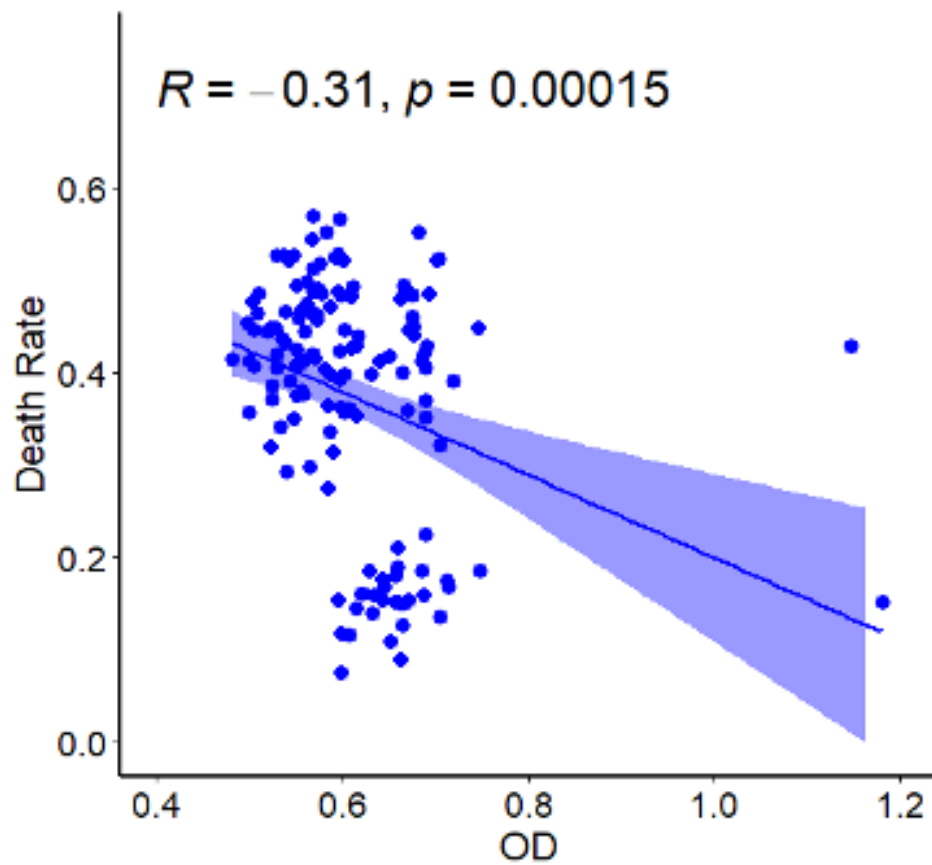

**Figure S1. *C. elegans* killing negatively correlate with *C. albicans* growth.** *C. albicans* growth was plotted against *C. elegans* fraction dead (0 corresponds to no death, and 1 corresponds to complete killing). Purple shading represents a 95% confidence interval. Statistical significance for Pearson correlation was calculated using ggscatter function in R.
